# Supplementary material
Source: PubMed Central journal article supplement (PMC7308063)
Supplement: jciinsight-5-137189-s129.pdf [file jciinsight-5-137189-s129.pdf]

# **Cholesterol-25-hydroxylase promotes efferocytosis and resolution of lung inflammation**

Jennifer H. Madenspacher<sup>1</sup>, Eric D. Morrell<sup>2</sup>, Kymberly M. Gowdy<sup>3,4</sup>, Jeffrey G. McDonald<sup>5</sup>, Bonne M. Thompson<sup>5</sup>, Ginger Muse<sup>1</sup>, Jennifer Martinez<sup>1</sup>, Seddon Thomas<sup>1</sup>, Carmen Mikacenic<sup>2</sup>, Jerry A. Nick<sup>6</sup>, Edward Abraham<sup>7</sup>, Stavros Garantziotis<sup>1</sup>, Renee D. Stapleton<sup>8</sup>, Julie M. Meacham<sup>1</sup>, Mary Jane Thomassen<sup>9</sup>, William J. Janssen<sup>6</sup>, Donald N. Cook<sup>1</sup>, Mark M. Wurfel<sup>2</sup>, Michael B. Fessler<sup>1</sup>

<sup>1</sup>Immunity, Inflammation and Disease Laboratory, National Institute of Environmental Health Sciences, NIH, Research Triangle Park, NC 27709

<sup>2</sup>Section of Pulmonary, Critical Care, and Sleep Medicine, Harborview Medical Center, Seattle, WA 98104

<sup>3</sup>Division of Pulmonary, Critical Care and Sleep Medicine, The Ohio State University Wexner Medical Center, Columbus, OH 43210

<sup>4</sup>Davis Heart and Lung Research Institute, The Ohio State University Wexner Medical Center, Columbus, OH 43210

<sup>5</sup>Department of Molecular Genetics, University of Texas Southwestern Medical Center, Dallas, TX 75390

<sup>6</sup>Department of Medicine, National Jewish Health, Denver, CO 80206

<sup>7</sup>Department of Medicine, Leonard M. Miller School of Medicine, University of Miami, Miami, FL 33136

<sup>8</sup>Department of Medicine, Larner College of Medicine, University of Vermont, Burlington, VT 05405

<sup>9</sup>Department of Internal Medicine, Brody School of Medicine, East Carolina University, Greenville, NC 27834

## **SUPPLEMENTAL INFORMATION**

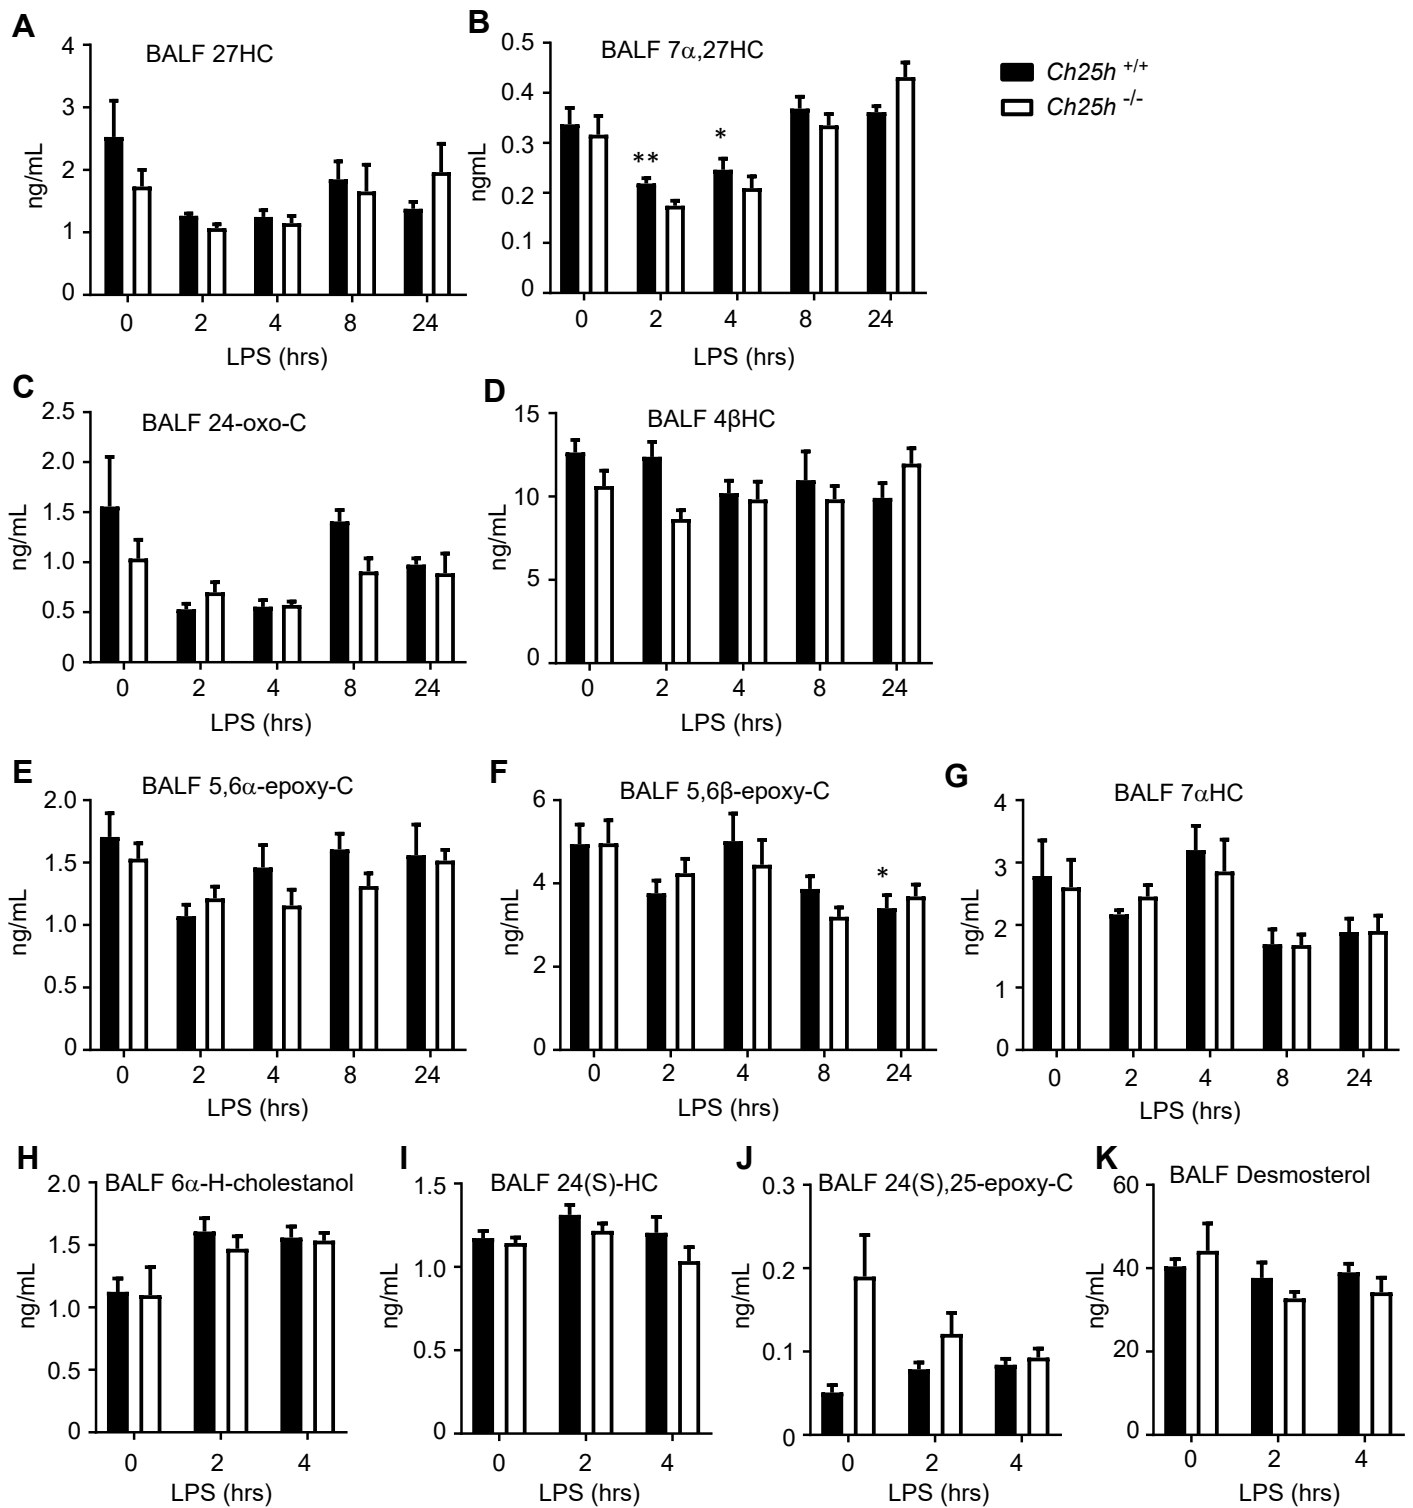

**Figure S1. Oxy(sterol) profile in LPS-exposed murine airspace.** (A-K) *Ch25h*<sup>+/+</sup> and *Ch25h*<sup>-/-</sup> mice (n=5-7/genotype/timepoint for panels A-G; n=2/genotype for 0 hrs and n=5/genotype for 2 and 4 hrs for panels H-K) were exposed to inhaled LPS and then the oxysterols and sterols indicated were quantified in bronchoalveolar lavage fluid (BALF) at various post-exposure time points. C = cholesterol; HC = hydroxycholesterol. Data are mean  $\pm$  s.e.m. \*, P<0.05; \*\*, P<0.01 compared to *Ch25h*<sup>+/+</sup> 0 hrs, by one-way ANOVA with Dunnett's multiple comparison test.

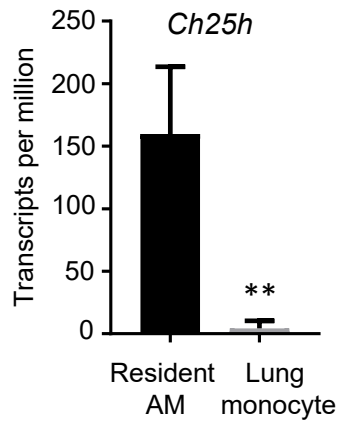

**Figure S2. *Ch25h* expression and its regulation in the murine lung.** Naïve C57BL/6 mice (n=3) underwent bronchoalveolar lavage and resident alveolar macrophages (AM) were then isolated by fluorescence-assisted cell sorting (CD64<sup>+</sup>F4/80<sup>+</sup>CD11c<sup>high</sup>CD11b<sup>low</sup>). Alternatively, naïve mice underwent enzymatic lung digestion, and lung parenchymal monocytes were sorted. *Ch25h* mRNA expression was evaluated by RNA-Seq. Data are mean +/- s.e.m. \*\*,  $P < 0.01$  by unpaired t-test.

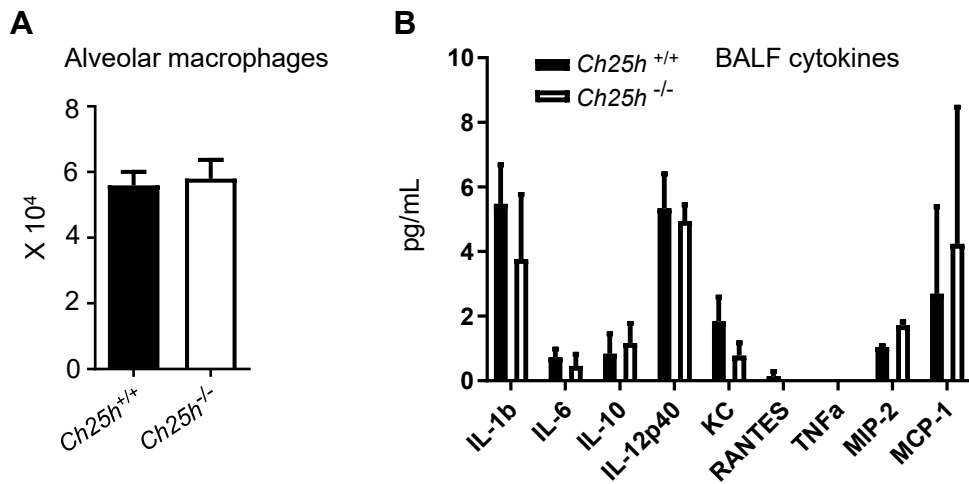

**Figure S3. Normal alveolar macrophage and cytokine profile in naïve *Ch25h*-null lung.** BALF was collected from naïve *Ch25h*<sup>+/+</sup> and *Ch25h*<sup>-/-</sup> mice (n=3/genotype) and analyzed for **(A)** alveolar macrophage count (manual count of cytopun cells) and **(B)** cytokine levels by multiplex assay. Data are mean +/- s.e.m.

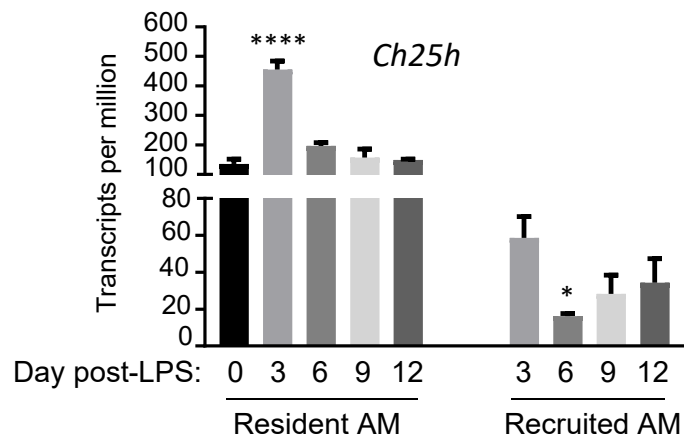

**Figure S4. *Ch25h* is differentially regulated in resident and recruited alveolar macrophages after LPS inhalation.** C57BL/6 mice were treated i.t. with 20  $\mu$ g of *E. coli* LPS. Alveolar macrophages (AMs) harvested by bronchoalveolar lavage at various time points were analyzed by RNA-Seq after initial FACS-sorting into resident AM (CD64<sup>+</sup>F4/80<sup>+</sup>CD11c<sup>high</sup>CD11b<sup>low</sup>) and recruited (i.e., blood monocyte-derived) AM (CD64<sup>+</sup>F4/80<sup>+</sup>CD11c<sup>low</sup>CD11b<sup>high</sup>) populations, as previously described (1). *Ch25h* mRNA expression over time is shown for both populations. Data are mean  $\pm$  s.e.m. N=3 mice per time point. \*, P<0.05; \*\*\*\*, P<0.0001 in comparison to day 0 (resident AM) or day 3 (recruited AM) by one-way ANOVA with Dunnett's multiple correction test.

**Alveolar Macrophage *Ch25h* Expression  
vs. 25HC BALF Concentration**

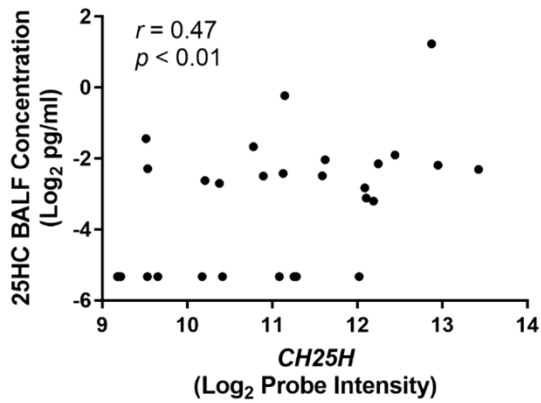

**Figure S5. Alveolar macrophage *CH25H* expression and 25HC bronchoalveolar lavage fluid (BALF) concentrations are correlated in acute respiratory distress syndrome.** BALF was collected within 48 hours of ARDS onset from subjects previously enrolled in a phase-II trial of omega-3 fatty acids for the treatment of ARDS (50). AM gene expression was assessed through genome-wide microarrays in patients ( $n = 30$ ) who had AMs purified from the BALF through an antibody-based negative selection approach (82). BALF 25HC concentrations were quantified by mass spectrometry. A Pearson's test was used to generate a correlation coefficient between normalized  $\log_2$  *CH25H* probe intensity and  $\log_2$  25HC BALF concentrations. The individual values are depicted.

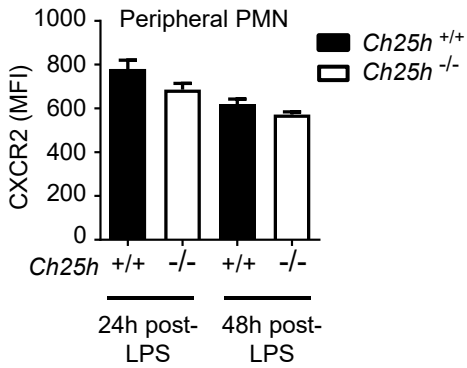

**Figure S6. Unchanged chemokine receptor display on circulating *Ch25h*<sup>-/-</sup> PMNs.** CXCR2 expression on peripheral blood (CD45<sup>+</sup>Ly6G<sup>+</sup>) neutrophils (PMNs) was quantified by flow cytometry in the indicated strains (n=4/genotype/timepoint) 24h and 48h post-inhalation of LPS. Data are mean ± s.e.m. \*, *P*<0.05 by unpaired t-test.

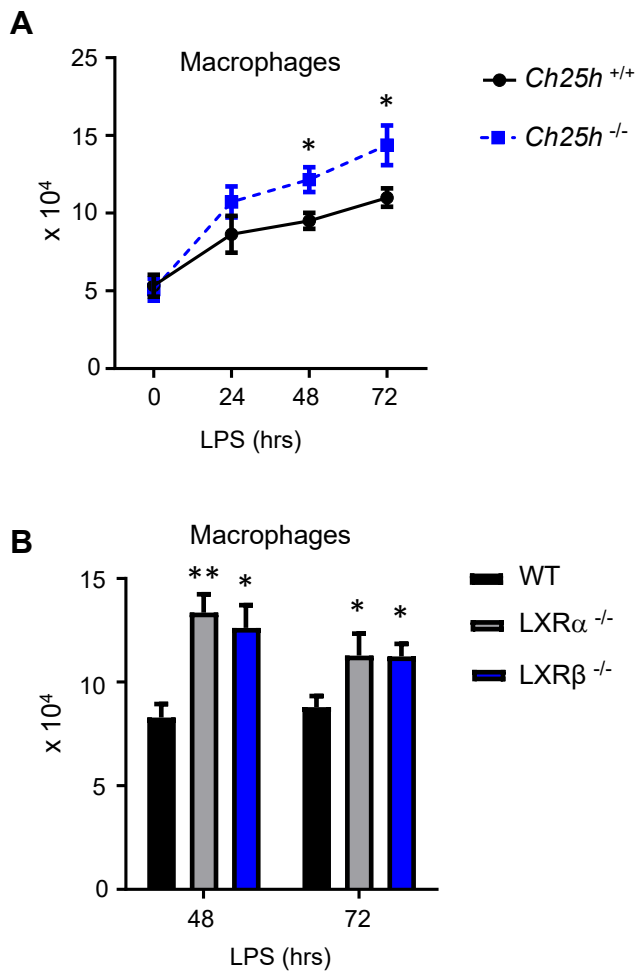

**Figure S7. Increased recruitment of macrophages to the airspace of *Ch25h*<sup>-/-</sup> and LXR-deficient mice.** Mice of the indicated genotypes (N=5-15/genotype/timepoint) were exposed to LPS aerosol (300 ug/ml, 30 min) and macrophages quantified in bronchoalveolar lavage fluid at the post-LPS time points shown. Data are mean  $\pm$  s.e.m. \*,  $P < 0.05$ , \*\*,  $P < 0.01$ . Unpaired t-test was used for panel A, one-way ANOVA with Dunnett's post-hoc test comparing KO strains to WT for each time point was used for B.
